# Supplementary material for: RB1-Negative Retinal Organoids Display Proliferation of Cone Photoreceptors and Loss of Retinal Differentiation
Source: MDPI journal article supplement (doi:10.3390/cancers14092166), 2022-04-26
Supplement: s1 [file s1]

## Article

# ***RB1*-Negative Retinal Organoids Display Proliferation of Cone Photoreceptors and Loss of Retinal Differentiation**

Deniz Kanber, Julia Woestefeld, Hannah Döpfer, Morgane Bozet, Alexandra Brenzel, Janine Altmüller, Fabian Kilpert, Dietmar Lohmann, Claudia Pommerenke and Laura Steenpass

## **Supplementary Methods: DNA preparation and whole genome sequencing**

Genomic DNA was isolated using FlexiGene DNA Kit (QIAGEN) according to manual. Whole genome sequencing (150bp, paired-end, NovaSeq 6000) and post-processing using Varbank 2.0 (<https://varbank.ccg.uni-koeln.de/varbank2/>) was conducted by the Cologne Center for Genomics (CCG), University of Cologne. Varbank conducted read-alignment (BWA-mem), mapping to genome version GRCh38 with annotations based on Ensembl b90 running a GATK-style pipeline (RRID:SCR\_001876). Variant calling used Samtools mpileup, GATK HaplotypeCaller and Plapytus for increased sensitivity. Settings were 'Datasets/Filtering' -> 'QC SNVs+short INDELs' -> 'Quorum level SNV'=1, resulting in 1,174 variants detected by at least one caller (Supplementary file 2). Filtering for new variants in homozygous or heterozygous cell lines was conducted ('Variants' -> 'A:PRID3850:SID106175:AID100177:75-H9' !~ '=' ) leaving 76 variants (Supplementary file 3). Removing variants that were duplicates on genomic level 58 variants that are private to or shared between *RB1*<sup>het</sup> and *RB1*<sup>ko</sup> remained (Fig. S1). Using Chopchop (RRID:SCR\_015723; <https://chopchop.cbu.uib.no/>) with gRNA sequence TACAGAAAAACATAGAAATCAGG verified the specific mismatch 0 (MM0) binding within the *RB1* gene and estimated one MM2, and 46 MM3 potential off-targets (Table S3), whereby none of those overlapped (bedtools, RRID:SCR\_006646) with the 76 new variants.

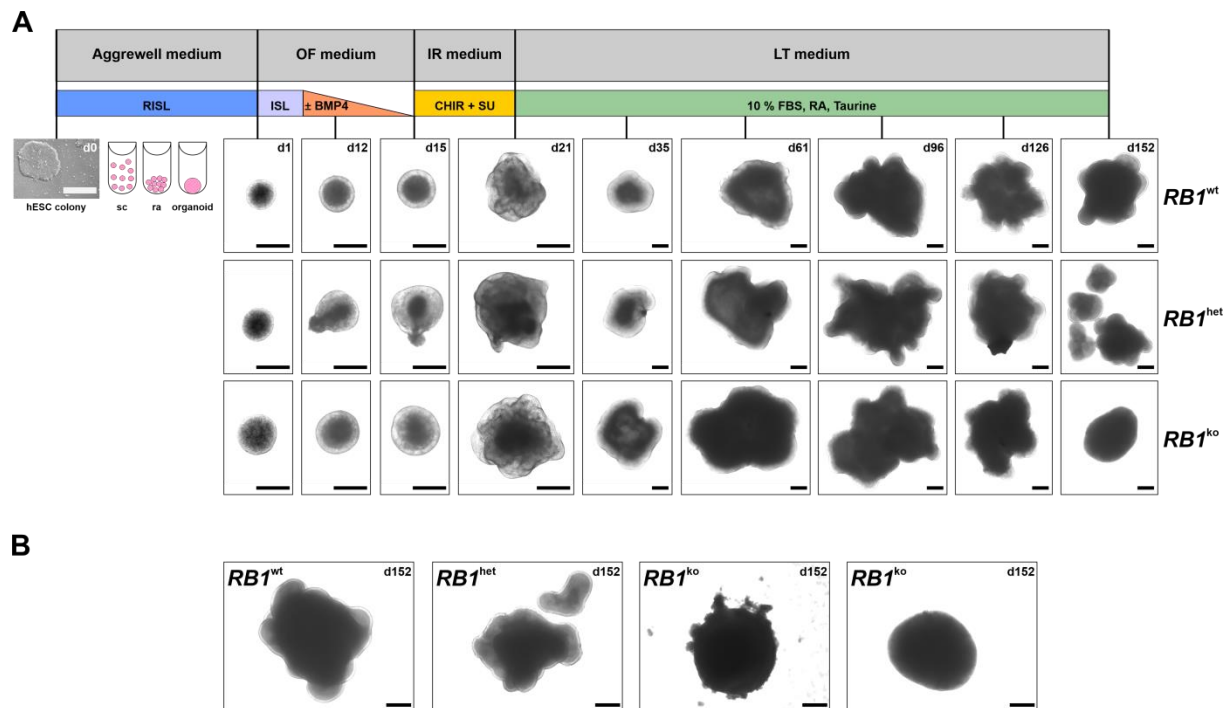

**Figure S1.** Retinal organoid differentiation. A) Differentiation is induced by single-cell aggregation and guided by small molecule addition. IR medium is supposed to enhance development of retinal pigment epithelium. Detailed protocol is described in [31]. Retinal tissue develops as bright outer rim from d12 onward. Genotype has no influence on morphology and size up to d126. Scale bar 50  $\mu$ m. OF: organoid-forming medium, IR: induction reversal, LT: long term, R: ROCK inhibitor Y-27632, I: IWR1-endo, S: SB-431542, L: LDN-193189, CHIR: CHIR99021, SU: SU5402, RA: retinoic acid, FBS: fetal bovine serum, sc: single cell, ra: re-aggregation. B) Retinal organoids at d152. Genotypes *RB1<sup>wt</sup>* and *RB1<sup>het</sup>* show presence of bright outer photoreceptor layer and retinal loops, both structures get lost in *RB1<sup>ko</sup>* between d126 and d152.

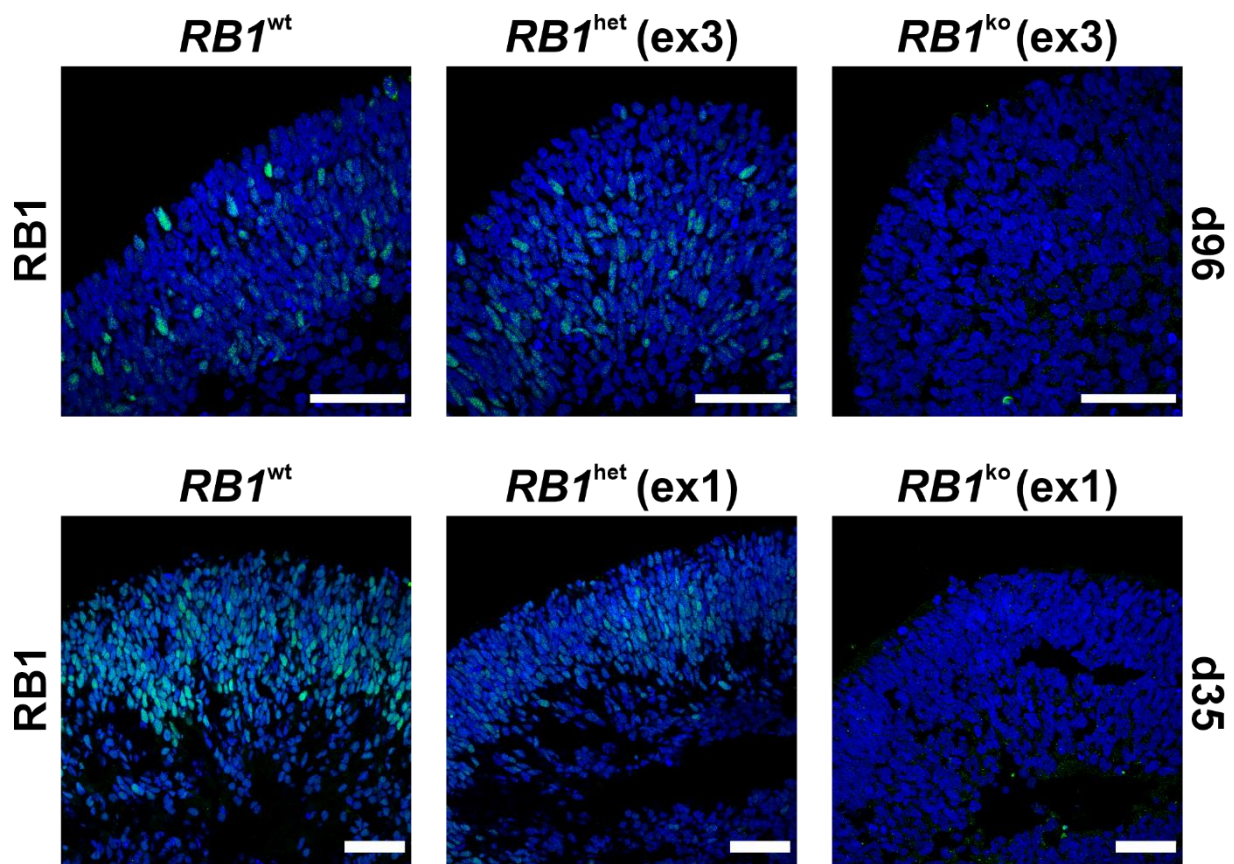

**Figure S2.** Analysis of pRB expression in edited H9 hESCs. Immunofluorescent staining for pRB (green) in retinal organoids differentiated from H9, H9\_RB1ex3 (top) and H9\_RB1ex1 cell lines (bottom). Nuclei were counterstained with DAPI (blue). Scale bar 50 $\mu$ m.

A

| Sample   | Sample ID | genotype     | total reads   | mean cov. | cov. 20x | variants |
|----------|-----------|--------------|---------------|-----------|----------|----------|
| 75-H9    | 100177    | parental, wt | 986,775,098   | 42        | 90.8     | 1096     |
| 76-C07   | 100178    | ko           | 1,002,088,948 | 43        | 90.8     | 1088     |
| 77-G12LS | 100179    | het          | 970,577,054   | 41        | 90.7     | 1079     |

B

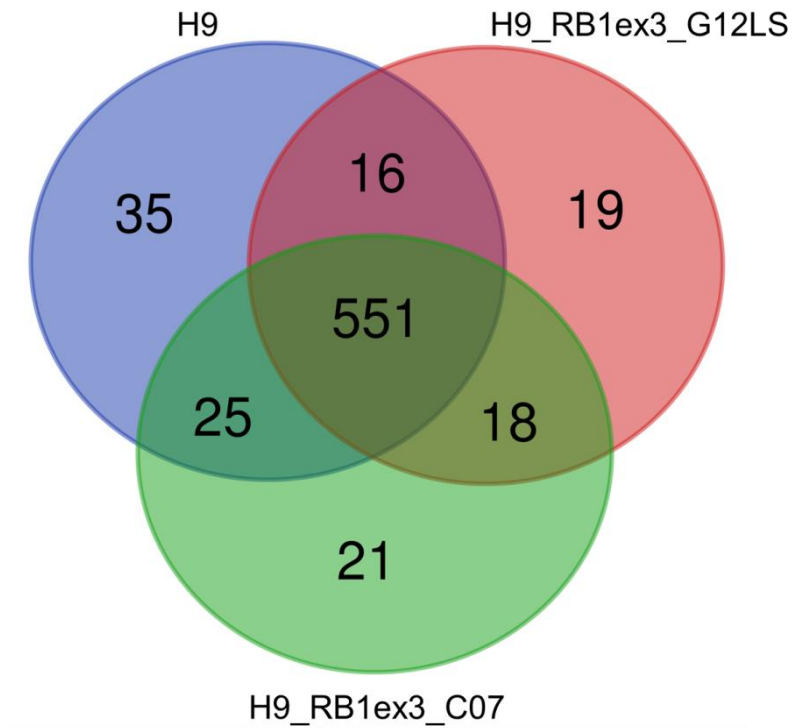

**Figure S3.** Whole genome sequencing of cell lines. **A)** Excerpt of the various QC numbers from Varbank. The full table from Varbank is available in Supplementary file 1. Cov.: coverage. **B)** Venn diagram of genomic variants detected in *RB1* genome-edited cell lines. Both edited cell lines carry a deletion of seven basepairs in exon 3 of *RB1*. H9\_RB1ex3\_G12LS in heterozygous, H9\_RB1ex3\_C07 in homozygous state [29]. No off-target sites were identified among variants not present in *RB1*<sup>wt</sup> (Table S3).



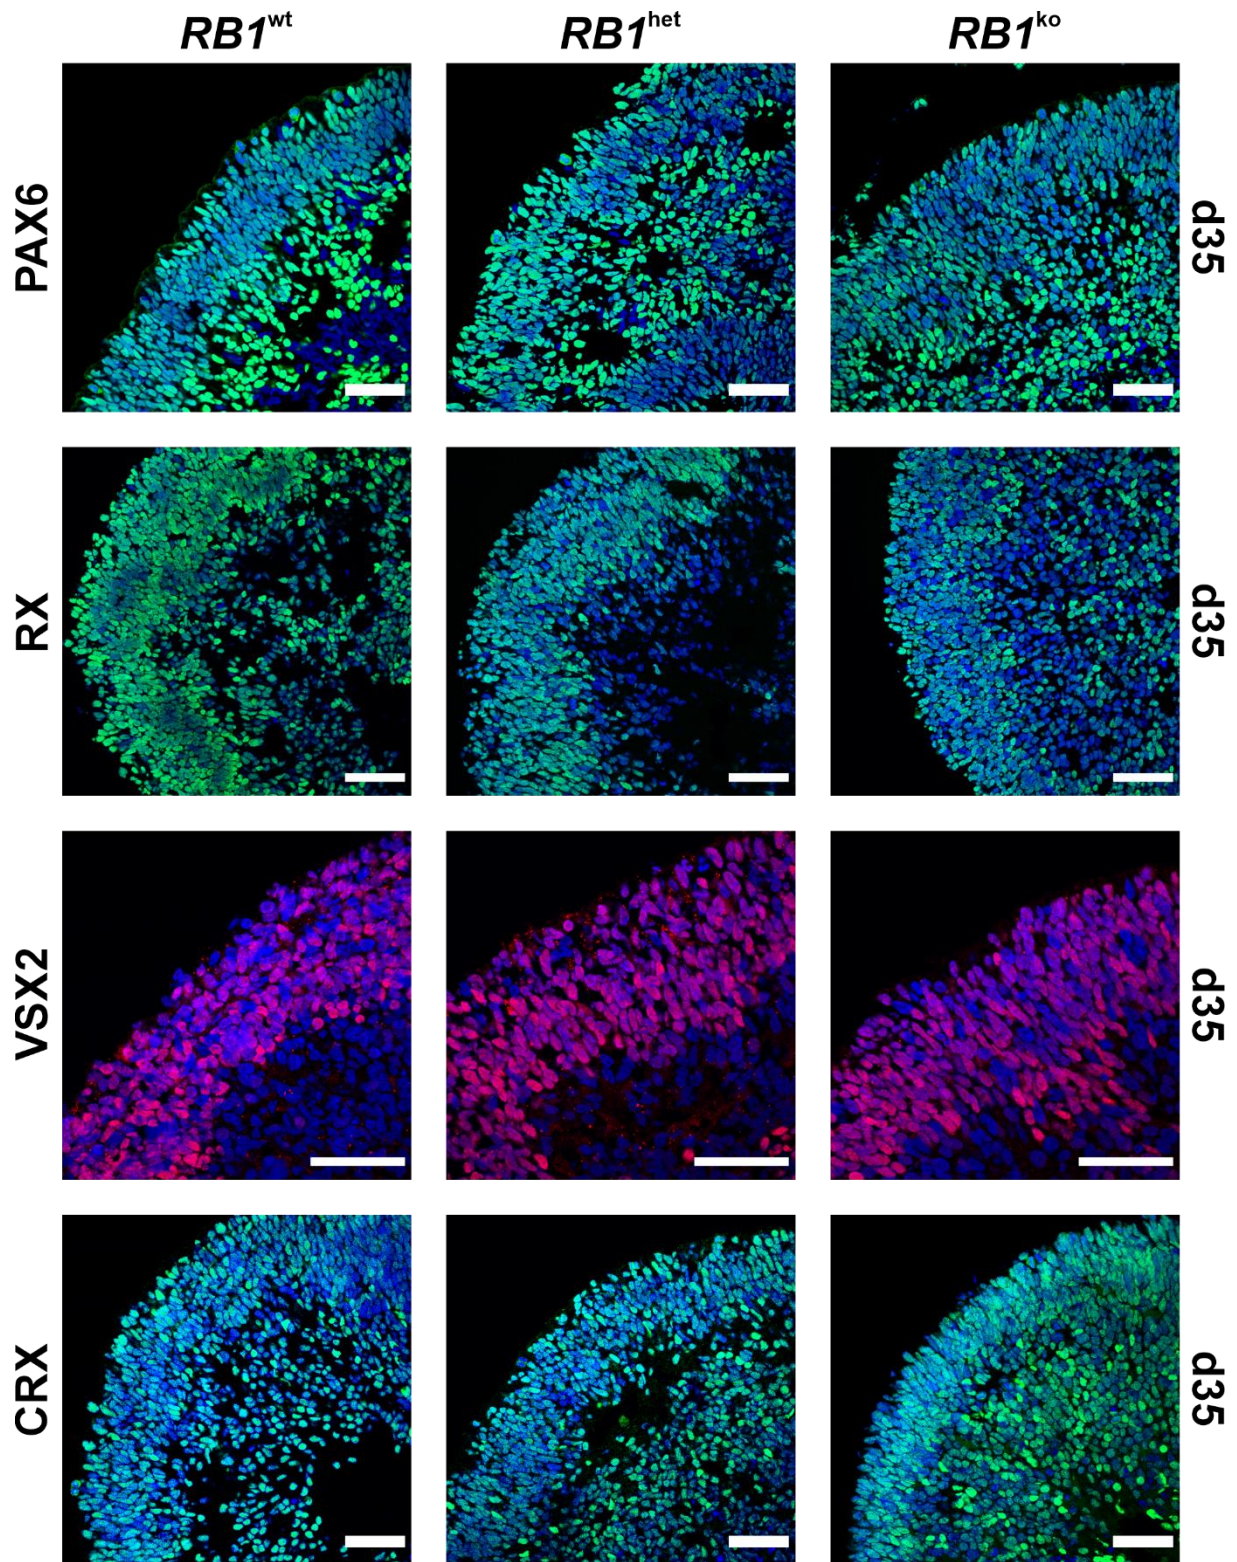

**Figure S4.** Presence of retinal progenitors. Representative images of retinal progenitors at d35 of differentiation stained for marker proteins PAX6 (green), RX (green), VSX2 (red) and CRX (green). Organoids of all three genotypes were organized into two layers, a dense outer layer with longitudinal cells and a loose inner layer. Progenitors are present in both structures. Nuclei were counterstained with DAPI (blue). Scale bar 50  $\mu$ m.



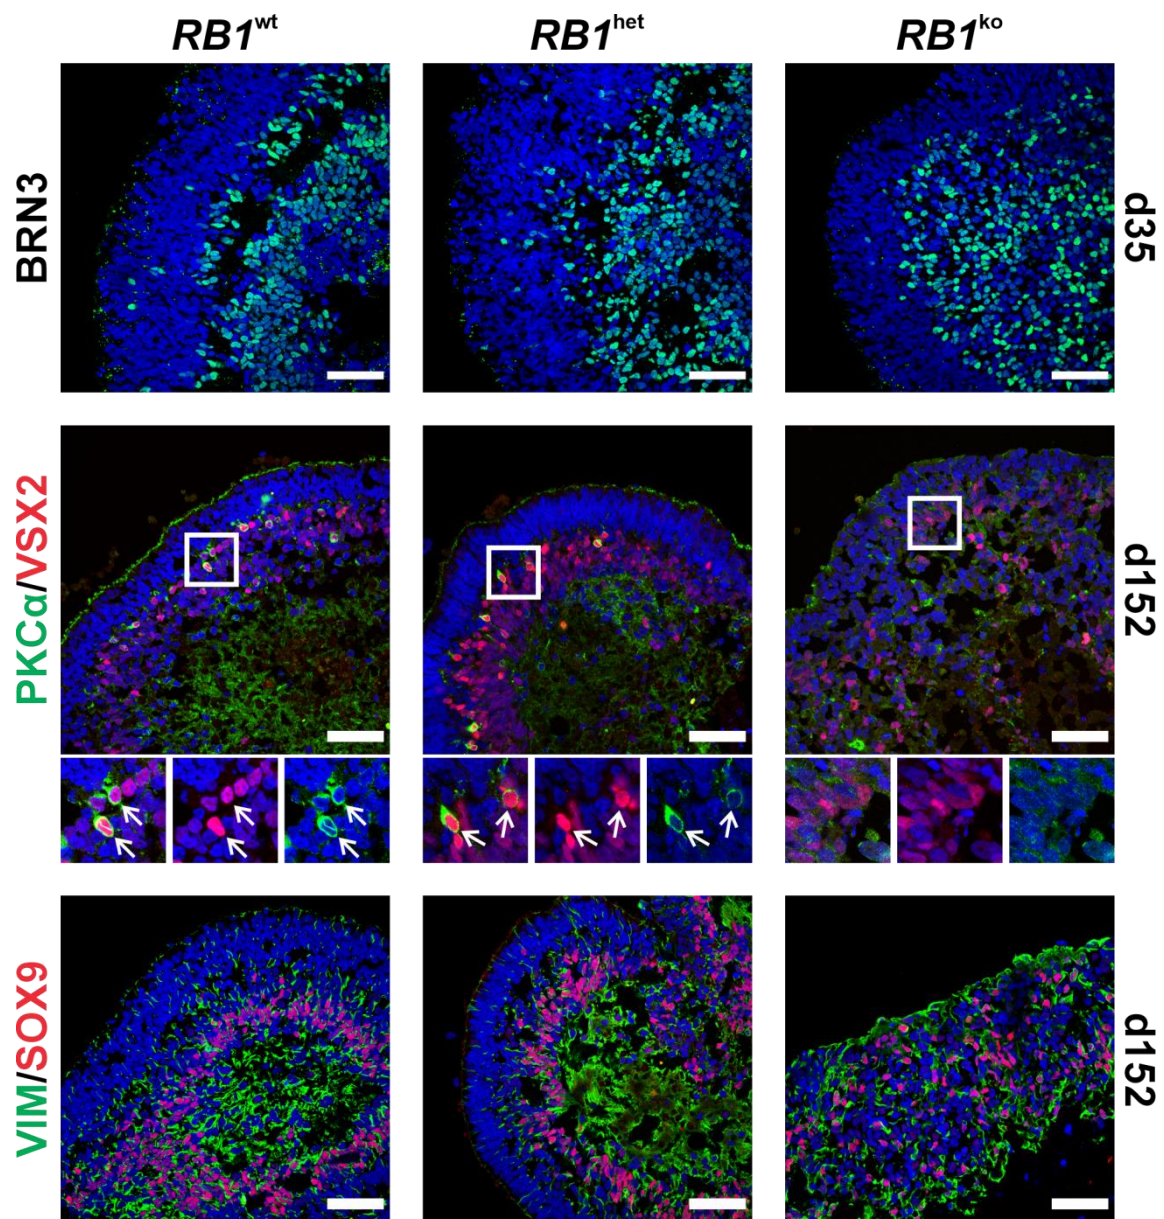

**Figure S5.** Immunofluorescent staining of ganglion, bipolar and Müller glia cells. Top: Ganglion cells (BRN3, green) at d35. Ganglion cells develop first and disappear later, probably to poor metabolic support and lack of neuronal input. Middle: Bipolar cells (PKCα/VSX2; green/red) at d152. Bottom: Müller glia (VIM/SOX9; green/red) at d152. Bipolar cells and Müller glia develop last. To accurately identify bipolar cells and Müller glia, staining for two marker proteins were used. Nuclei were counterstained with DAPI (blue), scale bar 50  $\mu$ m. Representative images are shown.

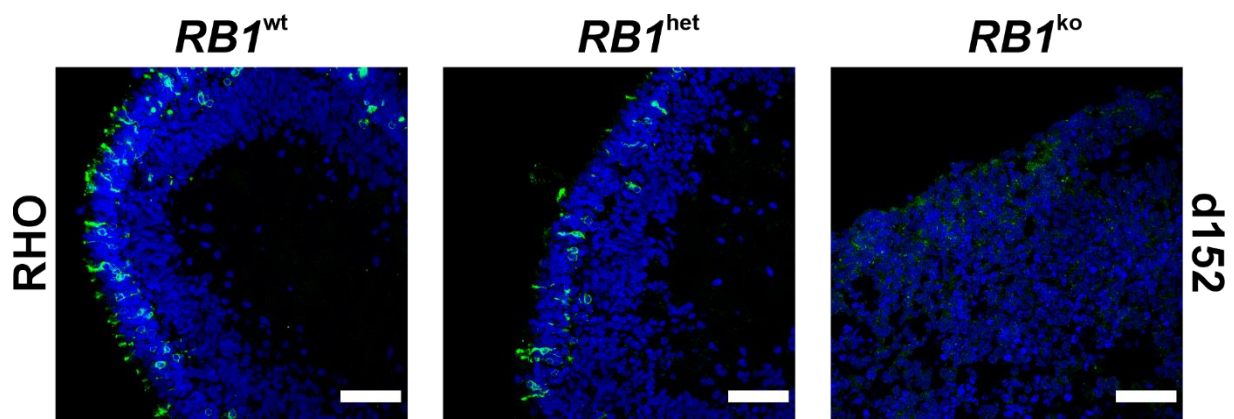

**Figure S6.** Immunofluorescent staining for rod photoreceptors. Representative images of mature rod photoreceptors (RHO, green) which were absent in *RB1*<sup>ko</sup> organoids at d152. Nuclei were counterstained with DAPI (blue). Scale bar 50  $\mu$ m.

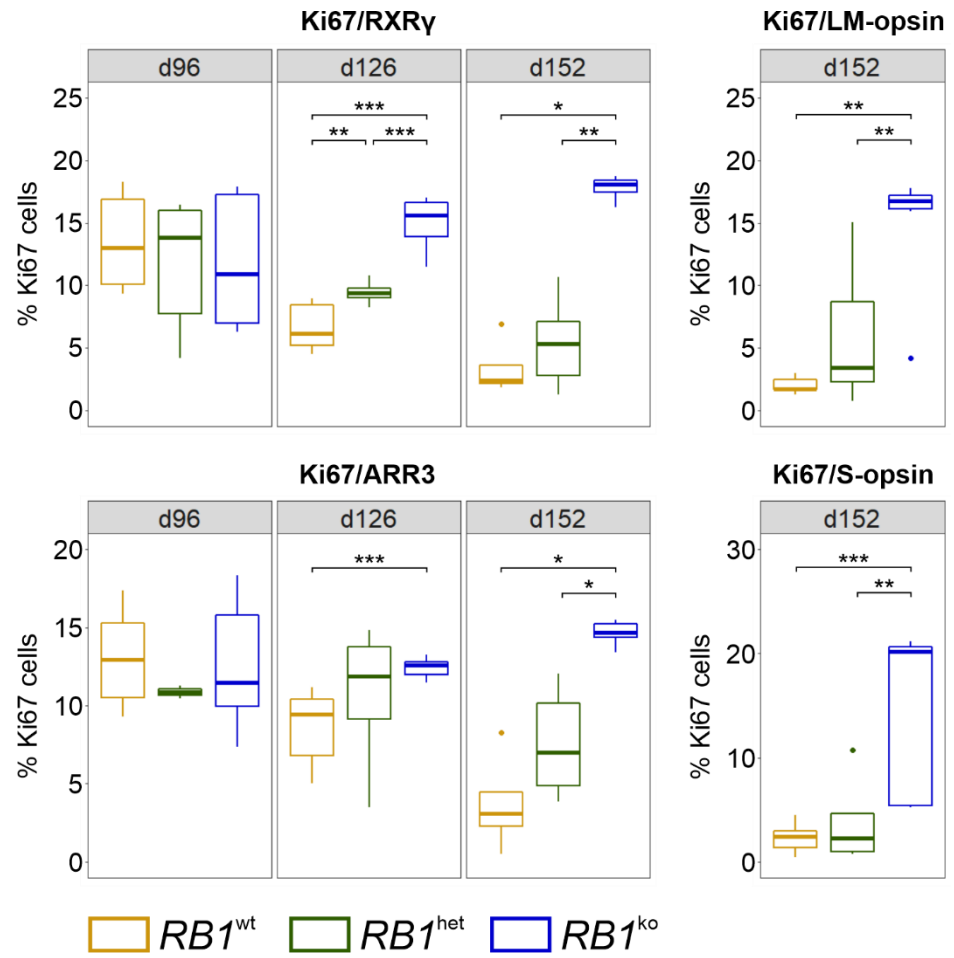

**Figure S7.** Quantification of Ki67-positive cells based on microscopy images. Data were determined in separate co-staining experiments for the indicated marker proteins. Percentages of Ki67-positive cells per total DAPI positive area are given. \*p $\leq$ 0.05, \*\*p $\leq$ 0.01, \*\*\*p $\leq$ 0.001.



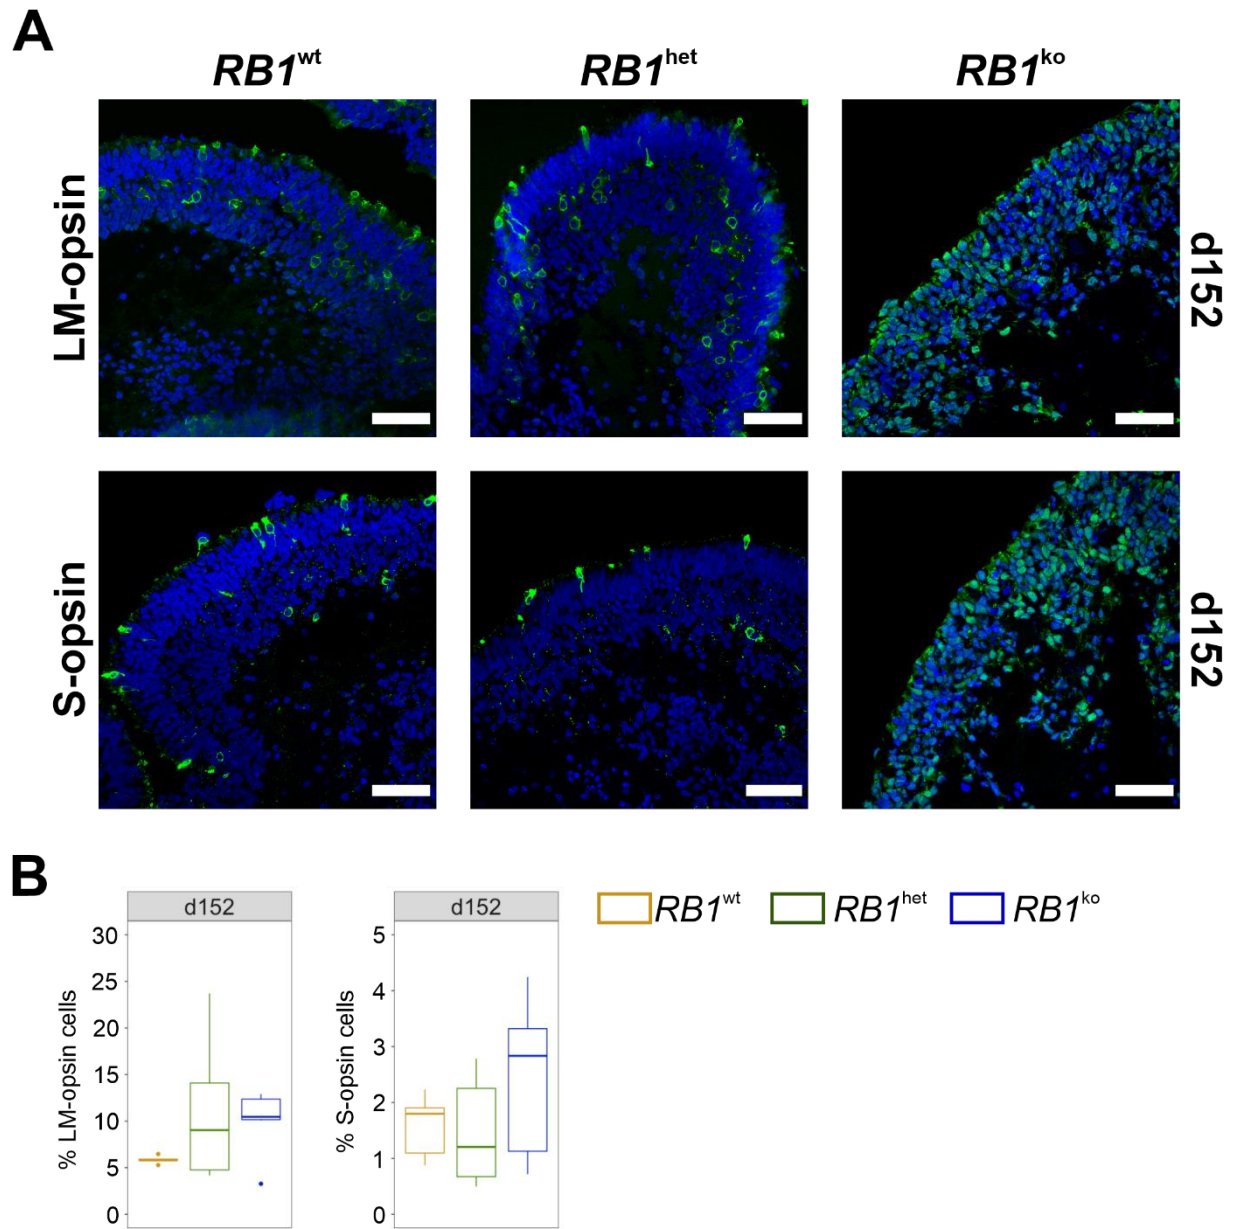

**Figure S8.** Immunofluorescent staining for LM-opsin and S-opsin. **A)** Representative images of LM-opsin and S-opsin (green) positive cone photoreceptor cells. Nuclei were counterstained with DAPI (blue). Scale bar 50  $\mu$ m. **B)** Quantification of LM-opsin and S-opsin positive cone photoreceptor cells based on microscopy images. Percentages of marker-positive cells per total DAPI positive area are given. Results were not significant.

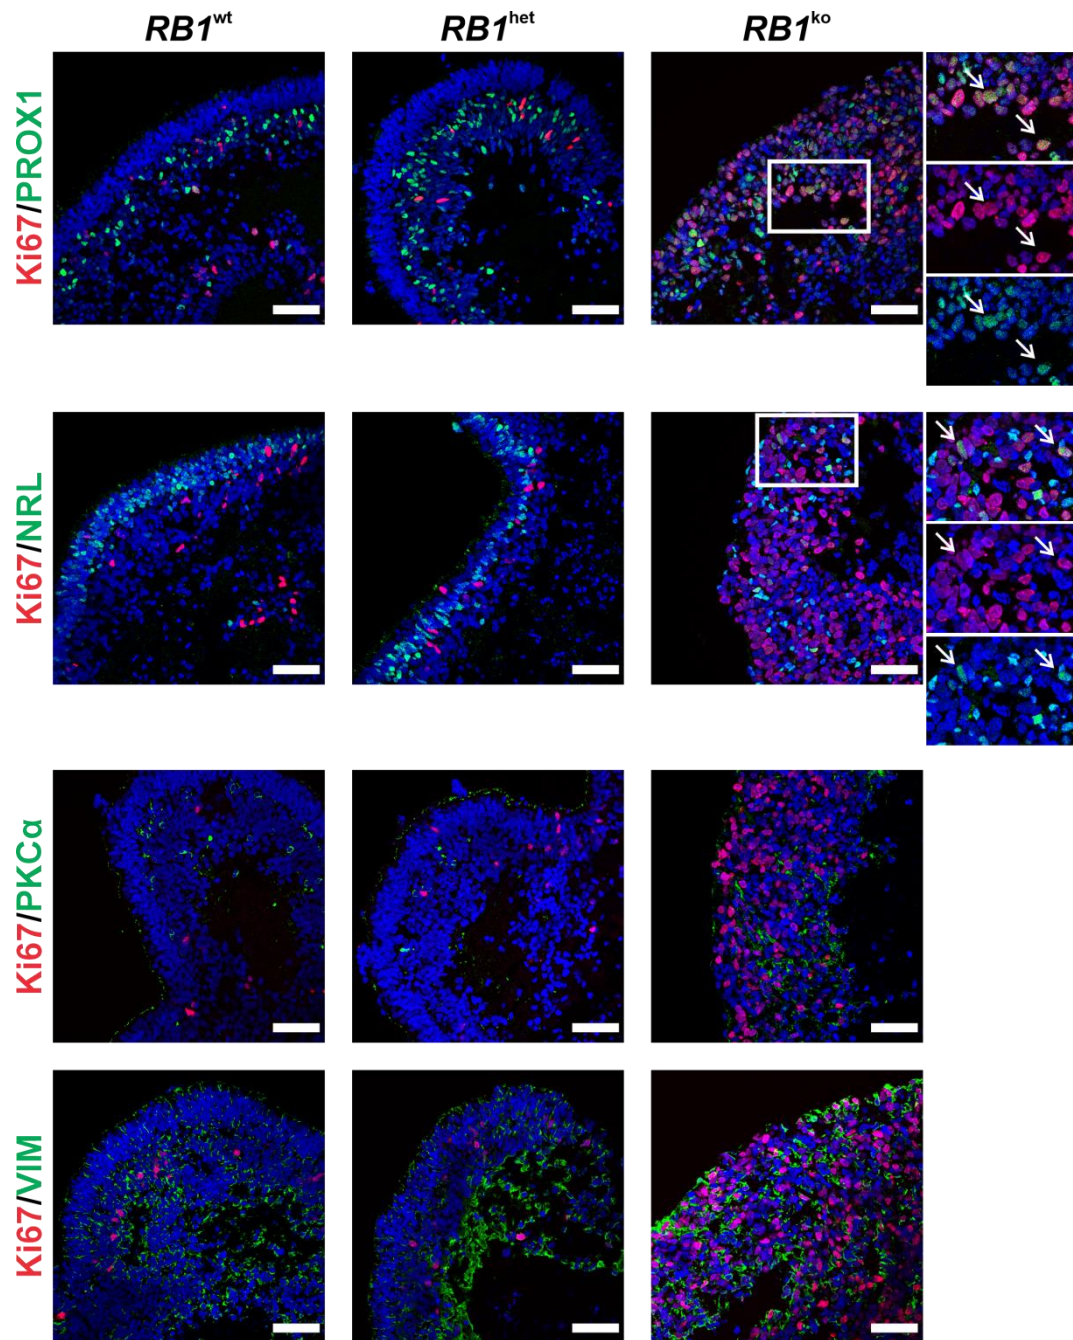

**Figure S9.** Ki67 in horizontal cells, rod photoreceptors and Müller glia. Representative images of co-immunofluorescent staining (d152) of cell-type-specific marker proteins (green) with proliferative marker Ki67 (red) for horizontal cells (PROX1), rod photoreceptors (NRL), bipolar cells (PKCα) and Müller glia cells (VIM). Arrows indicate double-positive cells. Scale bar is 50 μm. Nuclei were counterstained with DAPI (blue). Horizontal cells and rod photoreceptors were reduced in *RB1*<sup>ko</sup> organoids, bipolar cells were absent, and appearance of Müller glia was comparable to *RB1*<sup>wt</sup> and *RB1*<sup>het</sup> organoids. Ki67 positive cells were more abundant in *RB1*<sup>ko</sup> organoids and in these, layered structure observed in *RB1*<sup>wt</sup> and *RB1*<sup>het</sup> organoids was lost.



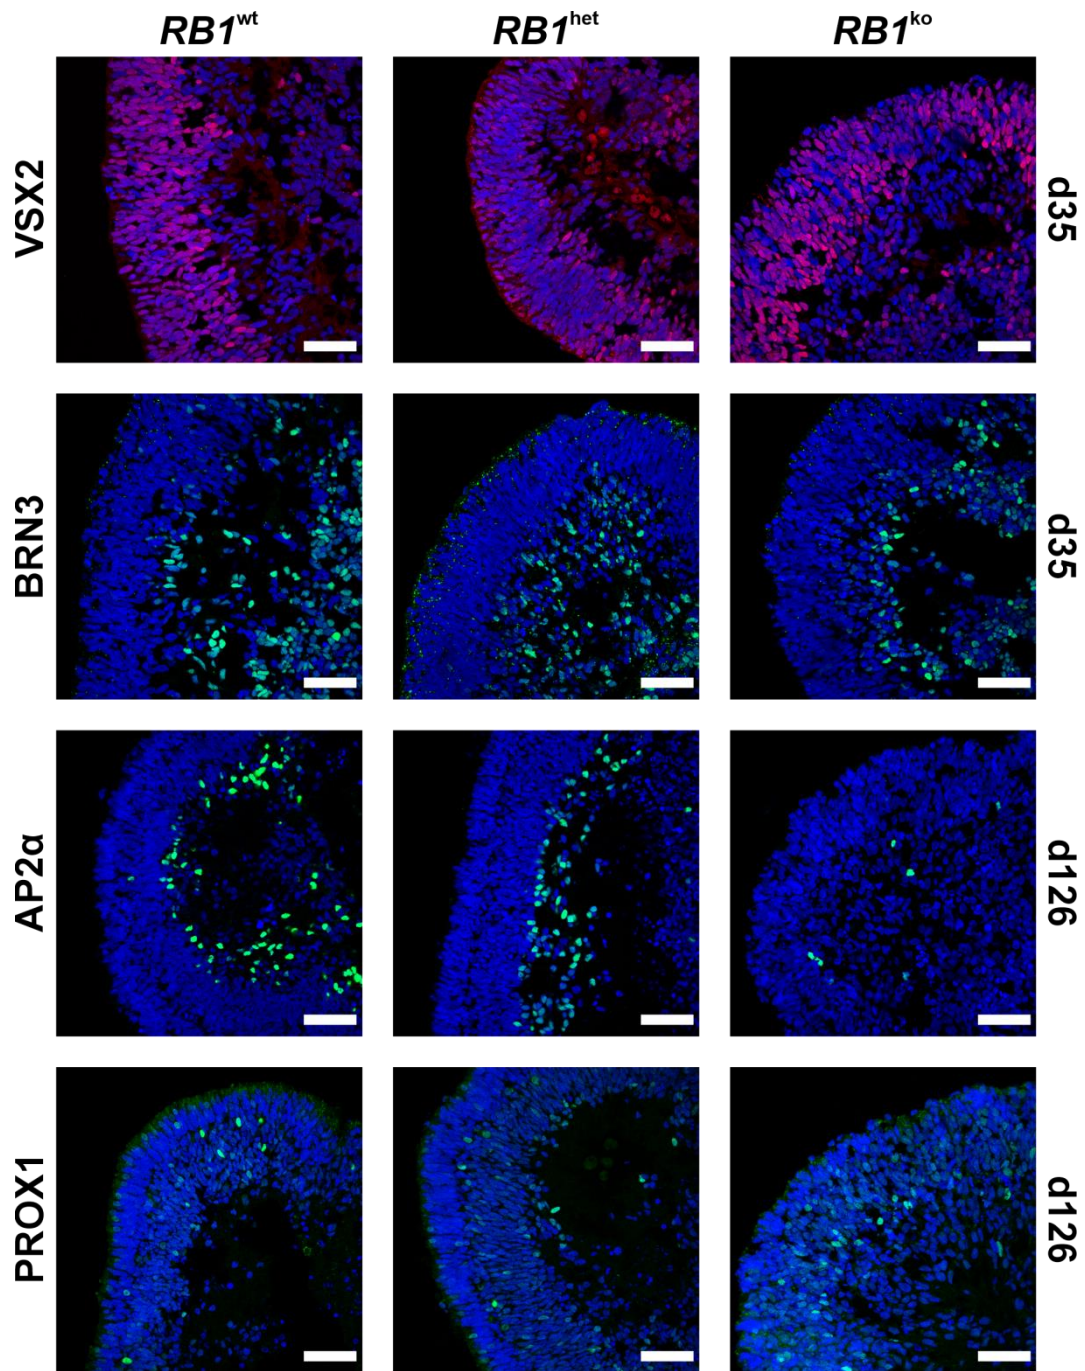

**Figure S10.** Retinal Differentiation of H9\_RB1ex1. Representative images of immunofluorescent staining of retinal organoids differentiated from H9\_RB1ex1\_8B3 (het) and H9\_RB1ex1\_8F2 (ko) cell lines as described. Marker proteins BRN3, VSX2, AP2 $\alpha$  and PROX1 were stained in green or red, nuclei were counterstained with DAPI (blue). Scale bar 50  $\mu$ m.

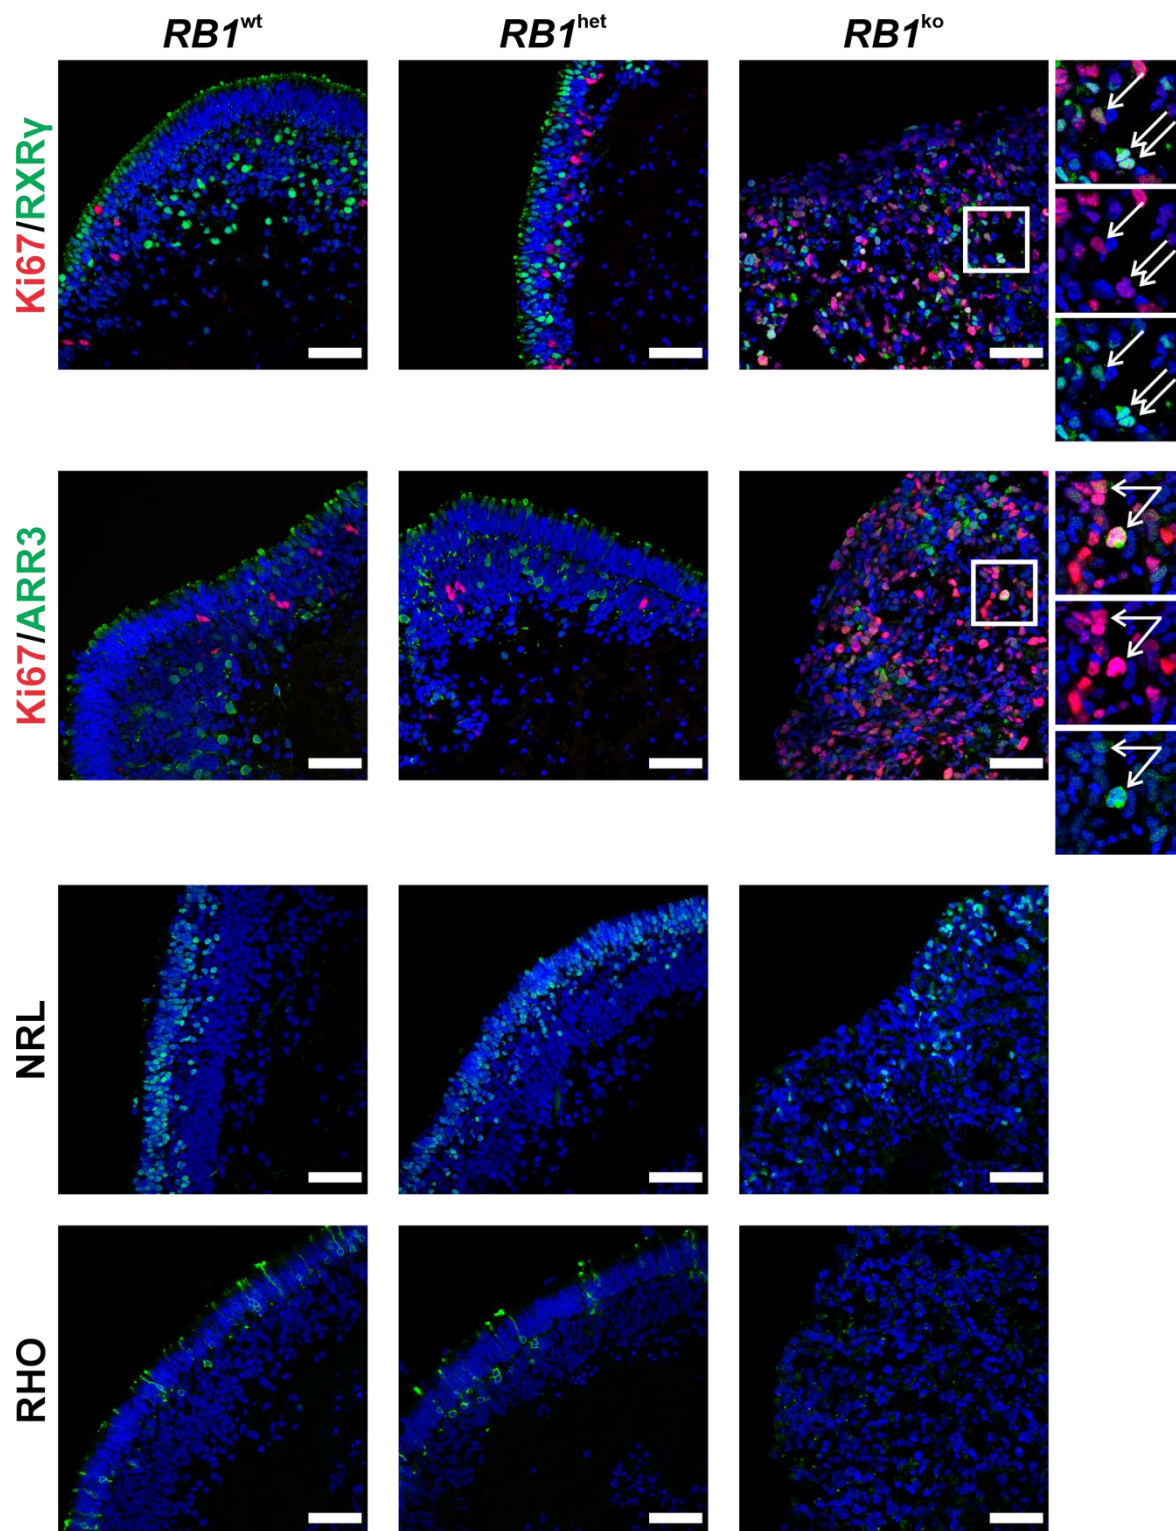

**Figure S11.** Retinal Differentiation of H9\_RB1ex1. Representative images of immunofluorescent staining (d152) for cone photoreceptors (RXRy, ARR3) and rod photoreceptors (NRL, RHO) of retinal organoids differentiated from H9\_RB1ex1\_8B3 (het) and H9\_RB1ex1\_8F2 (ko) cell lines as described. Marker proteins were stained in green, proliferation marker Ki67 in red, nuclei were counterstained with DAPI (blue). Area in the rectangle is enlarged; arrows indicate double-positive cells. Scale bar 50  $\mu m$ .



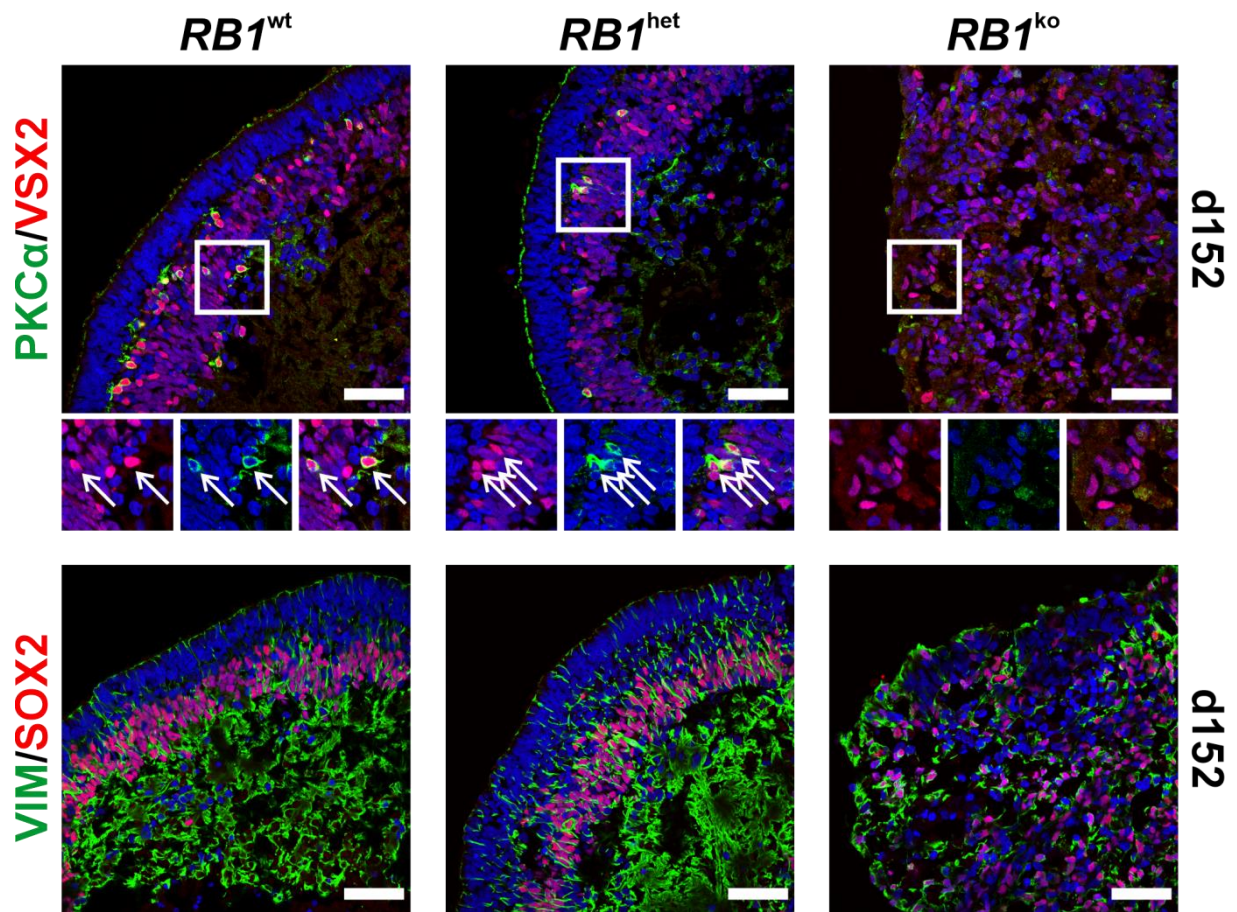

**Figure S12.** Retinal Differentiation of H9\_RB1ex1. Representative images of immunofluorescent staining for bipolar (PKCα/VSX2, green/red) and Müller glia cells (VIM/SOX2, green/red) of retinal organoids differentiated from H9\_RB1ex1\_8B3 (het) and H9\_RB1ex1\_8F2 (ko) cell lines as described. Area in the rectangle is enlarged; arrows indicate double-positive cells. Nuclei were counterstained with DAPI (blue). Scale bar 50 μm.

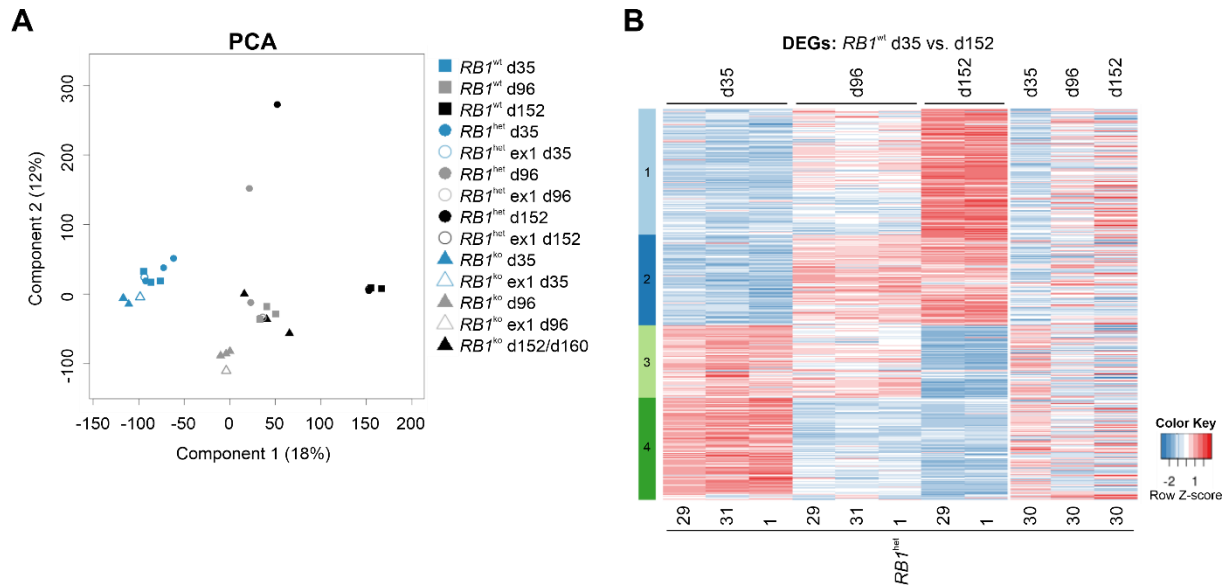

**Figure S13.** Gene expression analysis in  $RB1^{het}$  samples of experiment 30. A) PCA of RNA-seq analyses including all samples. Samples  $RB1^{het}$  are depicted as circles, identifying two samples as outliers (d96 and d152). Look up of sample indexes showed that both samples belong to experiment 30. B) DEGs and clusters are as shown in Figure 5. Number of differentiation experiment as specified in Table S2 is given below the plot.  $RB1^{het}$  samples showed same expression patterns as  $RB1^{wt}$  samples, except for samples of experiment 30. Samples of this experiment were therefore excluded from further analyses.  $p\text{-adjust} < 0.05$ ,  $\log_2(FC) > 1$ .

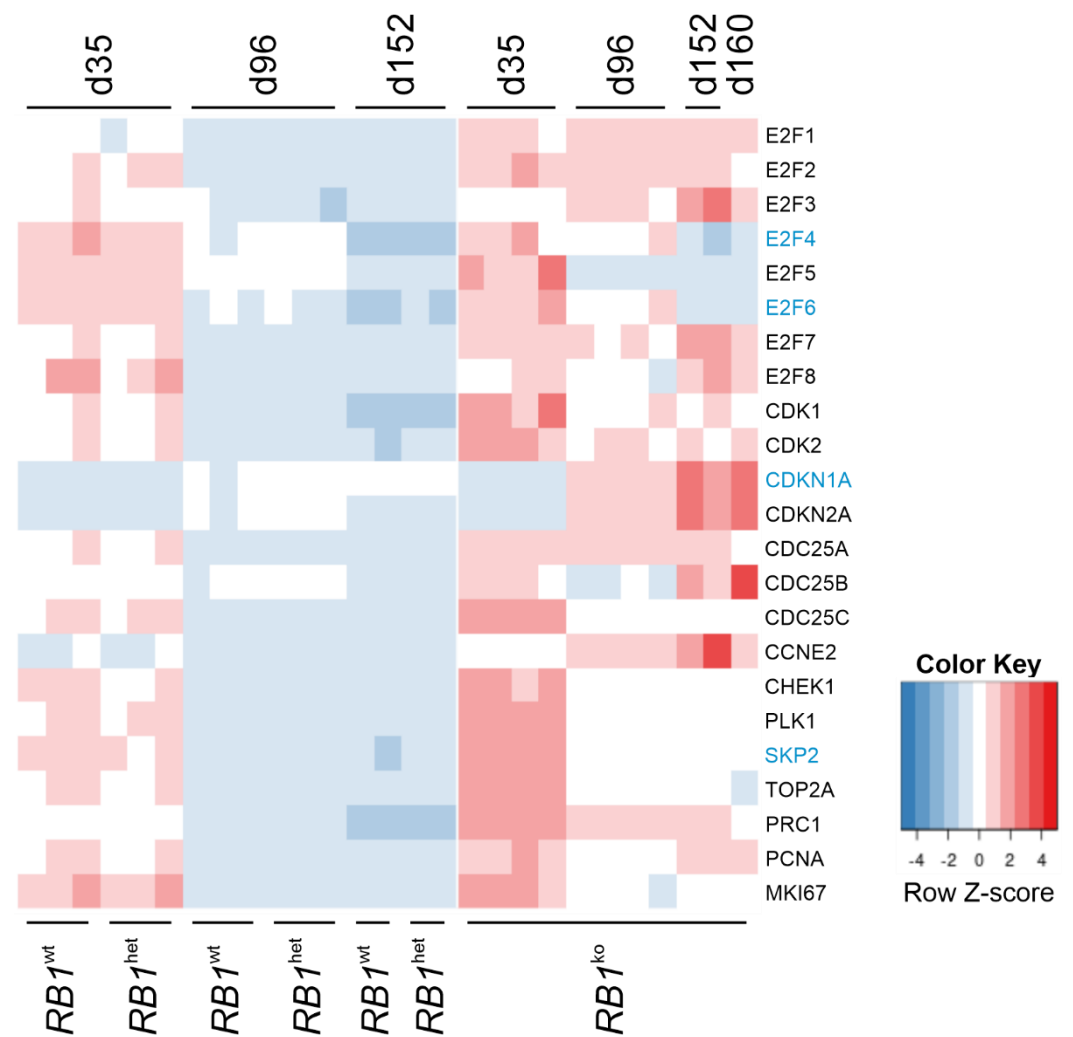

**Figure S14.** Gene expression of E2F transcription factors and cell cycle marker genes. Genes identified as DEG in the multiparametric analysis of Figure 6 ( $p\text{-adjust} < 0.05$ ,  $\log_2(\text{FC}) > 1$ ) are written in black, genes written in blue do not show significant differential gene expression between *RB1*<sup>wt</sup>/*RB1*<sup>het</sup> and *RB1*<sup>ko</sup> across the differentiation time course.

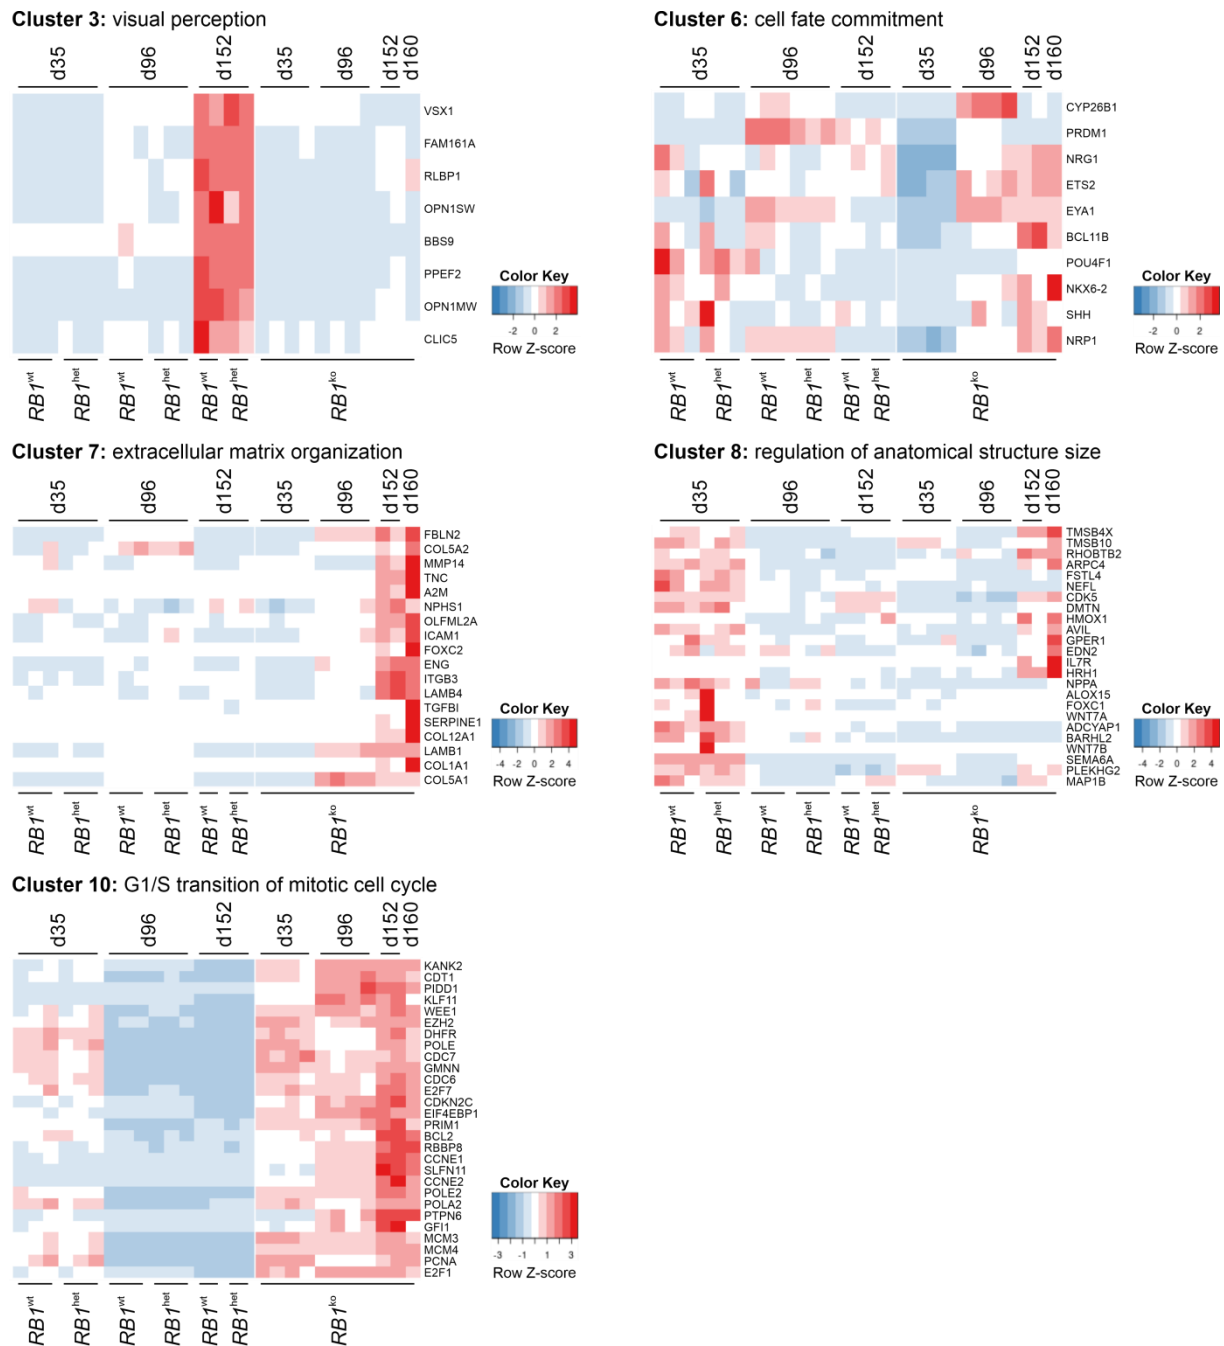

**Figure S15.** Heatmaps of DEGs determined by multiparametric analysis. Multiparametric analysis by DESeq2 ( $p\text{-adjust} < 0.05$ ,  $\log_2(FC) > 1$ ) considered 2 genotypes, three time points, and batches of experiments. Top GO terms of clusters showing differential gene expression profiles (Figure 6) are depicted here in detail.



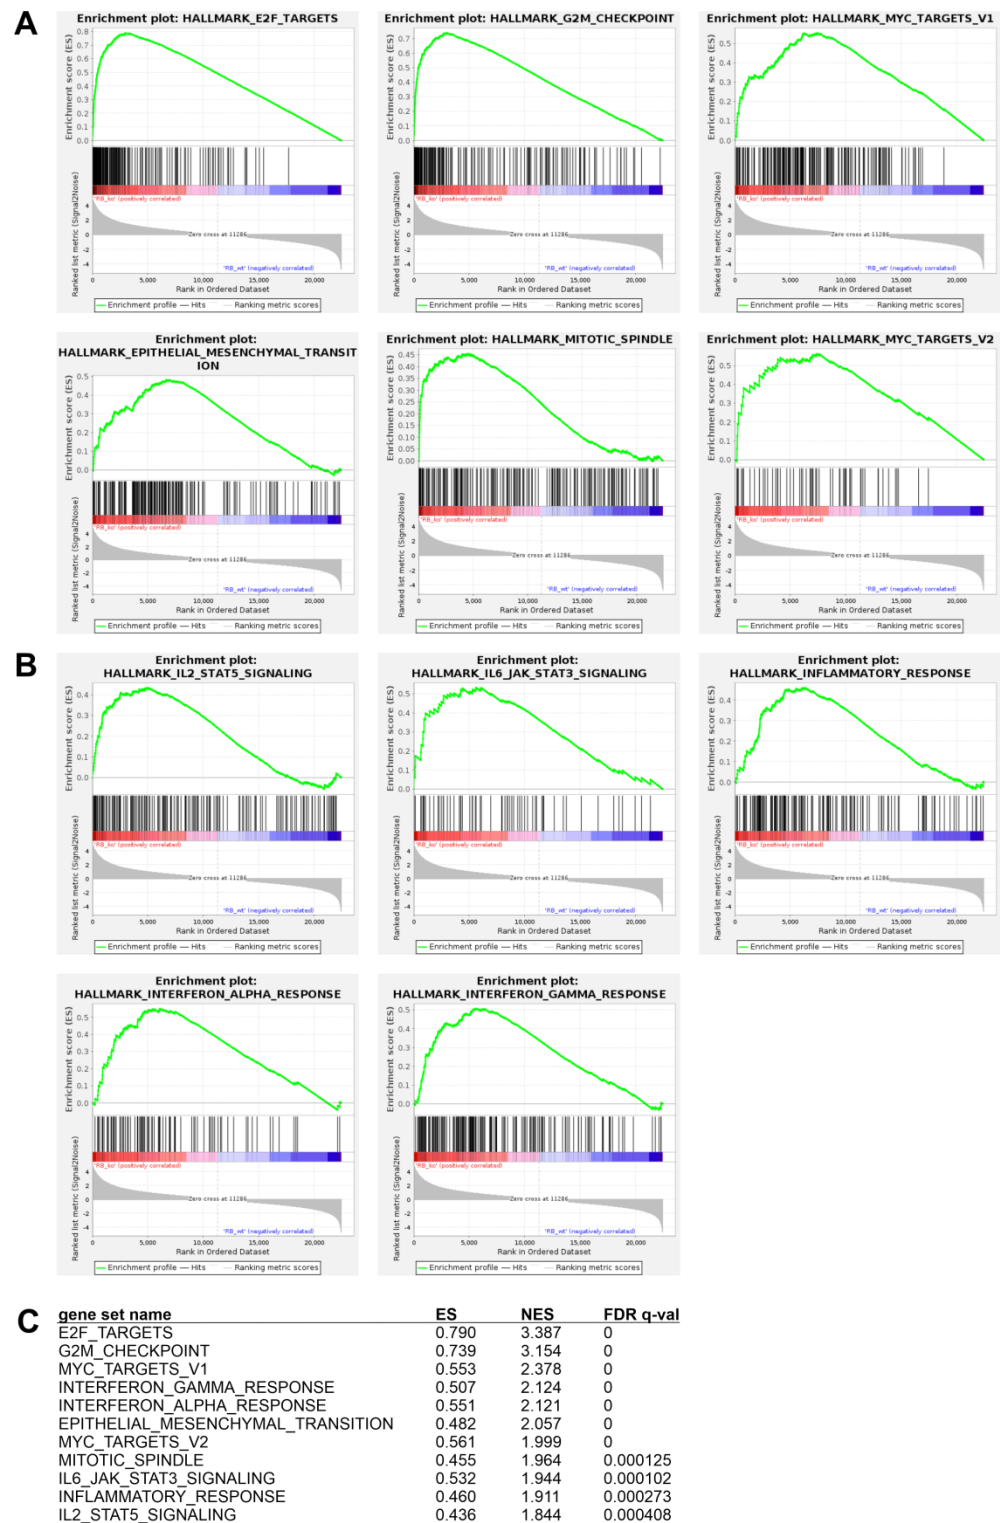

**Figure S16.** Gene set enrichment analysis (GSEA). Enrichment of genes in hallmark gene sets of MSigDB was analyzed using normalized count matrix of samples at d152. A) Plots for proliferation associated gene sets. B) Plots for immune associated gene sets. C) Table of GSEA results. ES: enrichment score, NES: normalized enrichment score, FDR q-val: false discovery rate q-value.

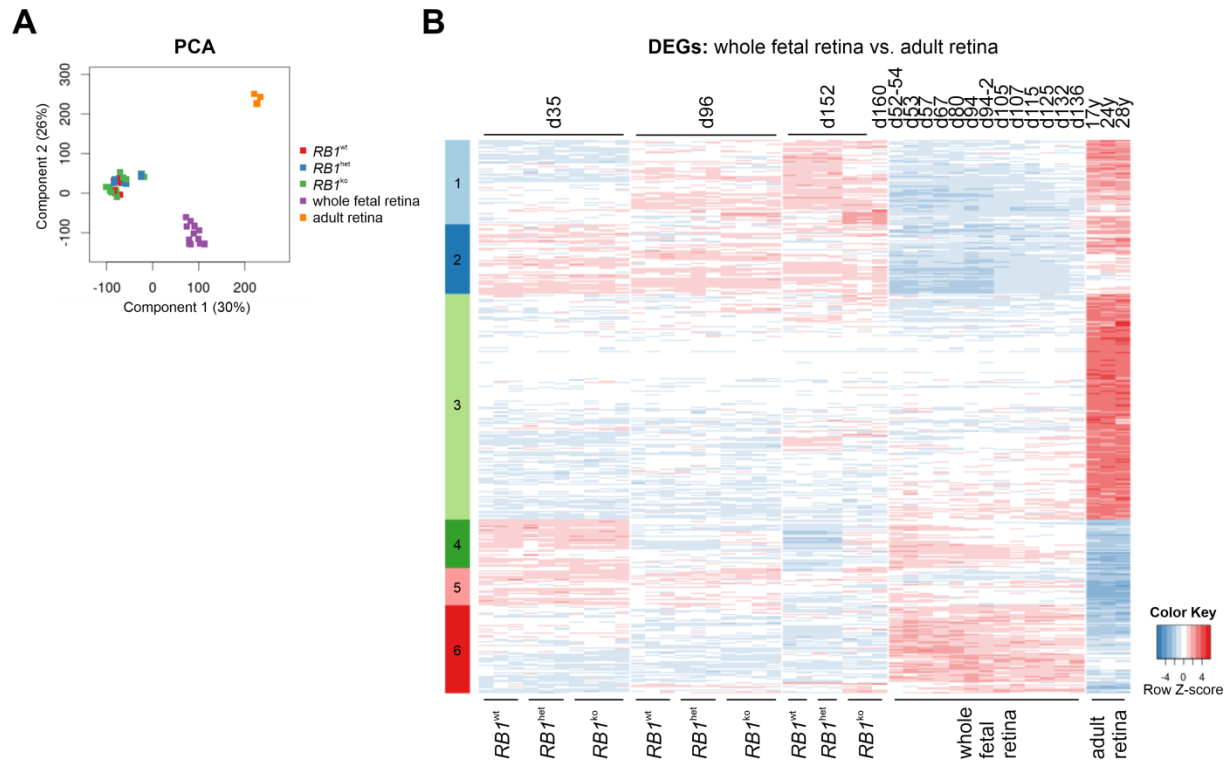

**Figure S17.** Comparison of gene expression between organoids and retina. A) Principal component analysis. Organoids were more similar to fetal than to adult retina. B) DEGs between fetal and adult retina were determined ( $p < 0.001$ ,  $\log_2(\text{FC}) > 2$ ) and expression of these genes in organoids was compared. Top enriched GO-terms of clusters were: c1: sensory perception of light stimulus; c2: none; c3: cilium movement; c4: nuclear division; c5: none; c6: positive regulation of neurogenesis. Expression in clusters c1, c4 and c5 is similar to fetal retina at d35 but to adult retina at d152, mimicking *in vivo* retina development. Samples were sorted first to time than to genotype. Following publicly available datasets were used: fetal retina: GSE104827, adult retina: NEI commons (dataset Retina Aging, samples 17yo.Retina.Norm, 24yo.Retina.Norm, 28yo.Retina.Norm).

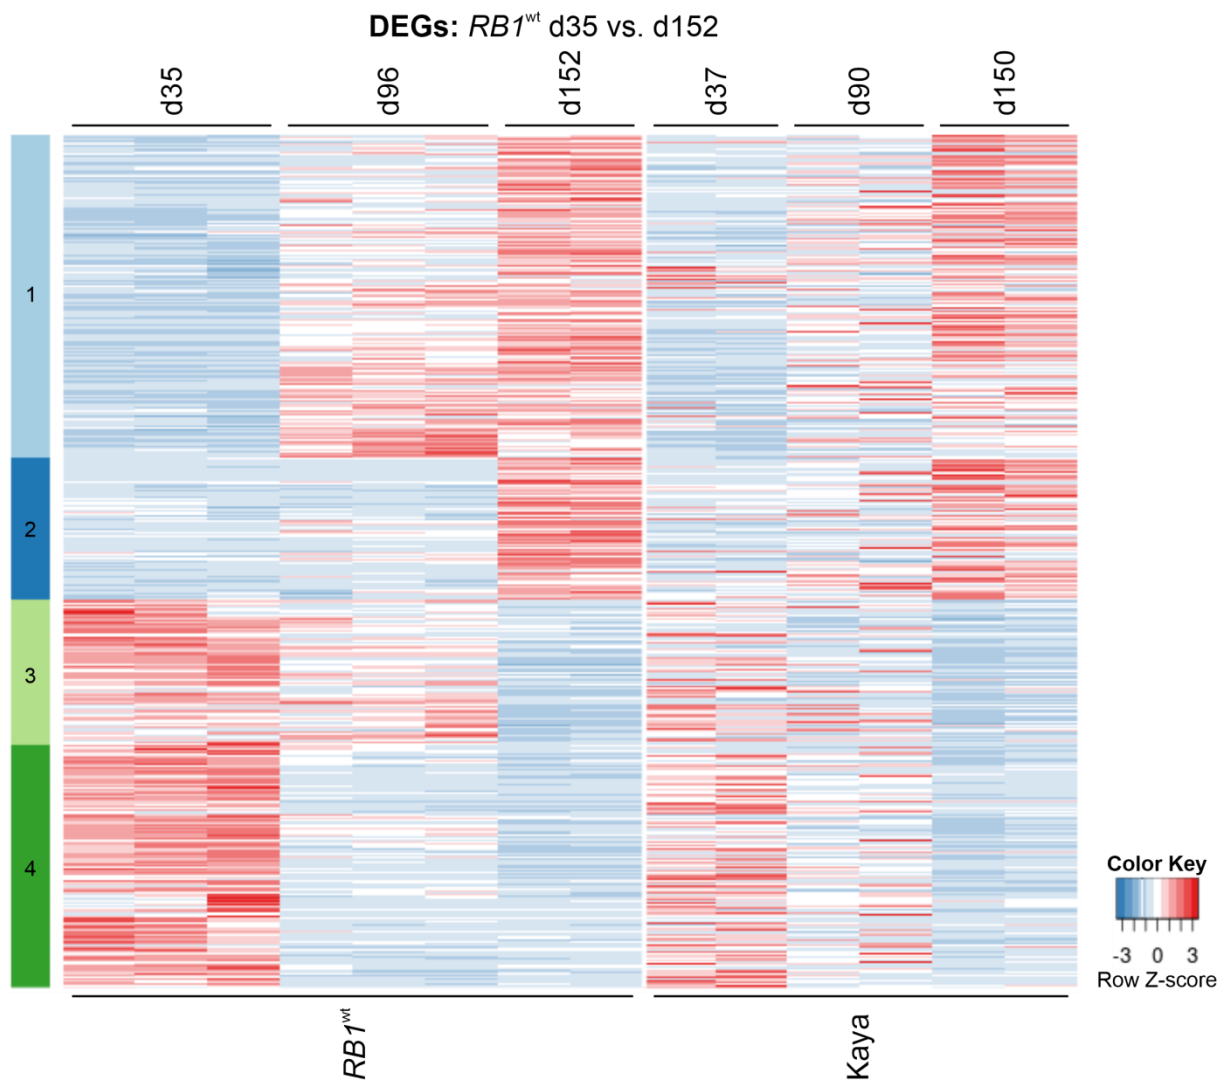

**Figure S18.** Comparison of gene expression in  $RB1^{wt}$  to retinal organoids generated by Kaya et al. Expression of DEGs determined in  $RB1^{wt}$  (d35 versus d152, Figure 5B) was compared to retinal organoids of H9 hESCs generated and analyzed by Kaya et al. (dataset GSE129104) [39]. Patterns were similar, especially for comparison of d35 vs Kaya d37 and d152 vs Kaya d150. Kaya et al. used a differentiation protocol relying on generation and plating of embryoid bodies and subsequent transfer of optic structures into suspension. It is unclear if single or pools of organoids were used for transcriptome analyses. Use of single organoids most likely results in more variation in gene expression.  $p\text{-adjust} < 0.05$ ,  $\log_2(FC) > 1$ .

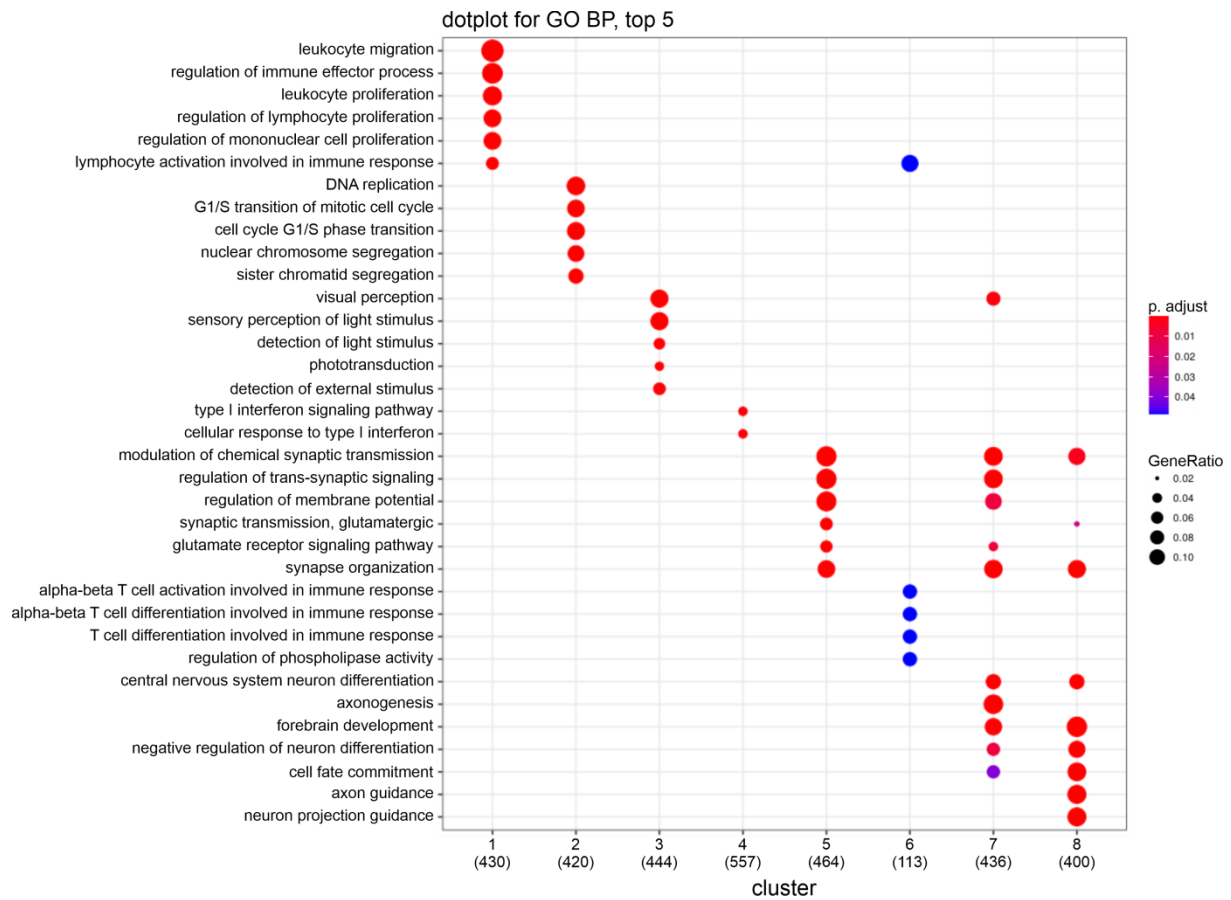

**Figure S19.** Top 5 GO terms in fetal retina versus retinoblastoma. DEGs between fetal retina and five retinoblastoma samples were determined and subjected to cluster analysis (Figure 7B). Top 5 ( $p\text{-adjust} < 0.05$ ) enriched biological processes per cluster determined by reduced redundancy GO analysis. The total number of DEGs in each cluster associated with a GO-term is given in parentheses, dot size: ratio of number of DEGs present in the specific GO-term versus total number GO-term associated DEGs in this cluster, dot color:  $p\text{-adjust}$ . If any of the top 5 terms of one cluster is present in another cluster, corresponding dots are plotted.



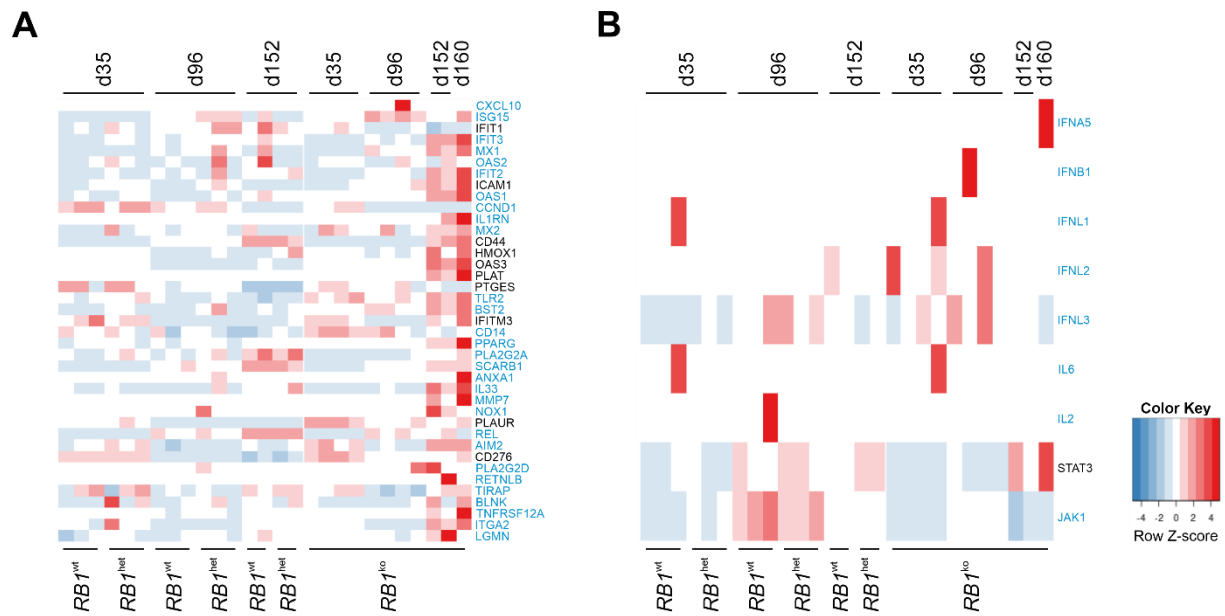

**Figure S20.** Parainflammation gene expression signature in *RB1<sup>ko</sup>* organoids at d152. A) Heatmap depicts expression of genes defined as parainflammation signature [49]. CXCL9 is not included since it showed no reads in our data set. B) Expression heatmap of genes encoding secreted immune regulators and related genes. *IFN* genes not listed had no reads. Genes identified as DEG in the multiparametric analysis of Figure 6 (p-adjust<0.05, log<sub>2</sub>(FC)>1) are written in black, genes written in blue do not show significant differential gene expression between *RB1<sup>wt</sup>/RB1<sup>het</sup>* and *RB1<sup>ko</sup>* across the differentiation time course.

**Supplementary file 1.** Macro for signal quantification using ImageJ (three channels: green/red/blue).

**Supplementary file 2.** Varbank export. The file DK01.variants\_all.xlsx contains the export after applying the 'Datasets/Filtering' -> 'QC SNVs+short INDELs' -> 'Quorum level SNV'=1 setting to the Varbank default. The Table comprises 1,174 variants that were detected by at least on variant caller. The 'MedPred'-value is the median of all pathogenicity rank scores obtained from the dbNSFP database.

**Supplementary file 3.** Varbank export after filtering for new variants. The file DK01.variants\_filtered.xlsx contains the result of applying Varbank setting ('Variants' -> 'A:PRID3850:SID106175:AID100177:75-H9' != '=') to Supplementary file 1. The 'MedPred'-value is the median of all pathogenicity rank scores obtained from the dbNSFP database.

**Table S1.** Antibodies.

| Antibody                                             | Company       | Order no      | Dilution | RRID             |
|------------------------------------------------------|---------------|---------------|----------|------------------|
| <b>Primary antibodies</b>                            |               |               |          |                  |
| Mouse anti-human retinoblastoma protein clone G3-245 | BD Pharmingen | 554136        | 1:200    | RRID:AB_395589   |
| Mouse anti-Ki-67 clone B56                           | BD Pharmingen | 550609        | 1:200    | RRID:AB_393778   |
| Mouse anti Retinal RX (G-12)                         | Santa Cruz    | sc-271889     | 1:200    | RRID:AB_10708730 |
| Sheep anti-human Chx10 (VSX2) (CT)                   | Exalphi       | X1179P        | 1:300    | RRID:AB_2999828  |
| Mouse anti-human CRX (M02) clone 4G11                | Abnova        | H00001406-M02 | 1:1000   | RRID:AB_425381   |

|                                               |                      |                |         |                  |
|-----------------------------------------------|----------------------|----------------|---------|------------------|
| Goat anti-BRN3 clone C13                      | Santa Cruz           | sc-6026        | 1:100   | RRID:AB_673441   |
| Rabbit anti-PROX1                             | Millipore            | AB5475         | 1:2000  | RRID:AB_177485   |
| Mouse anti-AP2                                | DSHB                 | 3B5-s          | 2mg/ml  |                  |
| Rabbit anti-RXR                               | SpringBio            | E4332          | 1:500   | RRID:AB_11218714 |
| Rabbit anti-ARR3                              | LifeSpan Biosciences | LS-C382134-100 | 1:250   |                  |
| Goat anti-NRL                                 | R&D Biosystems       | AF2945         | 1:100   | RRID:AB_2155098  |
| Mouse anti-RHO clone RET-P1                   | Sigma-Aldrich        | MAB5316        | 1:50    | RRID:AB_2156055  |
| Mouse anti-PRKC clone H-7                     | Santa Cruz           | sc-8393        | 1:100   | RRID:AB_628142   |
| Mouse anti-VIM clone E-5                      | Santa Cruz           | sc-373717      | 1:100   | RRID:AB_10917747 |
| Rabbit anti-SOX9 clone D8G8H                  | Cell Signaling       | 82630S         | 1:400   | RRID:AB_2665492  |
| Rabbit anti-opsin, blue (S-opsin)             | Millipore            | AB5407         | 1:300   | RRID:AB_177457   |
| Rabbit anti-opsin, red/green (LM-opsin)       | Millipore            | AB5405         | 1:300   | RRID:AB_177456   |
| <b>Secondary antibodies</b>                   |                      |                |         |                  |
| Rabbit anti-Goat IgG (H+L), Alexa Fluor® 488  | Thermo Fisher        | A-11078        | 1:1000  | RRID:AB_2534122  |
| Donkey anti-Sheep IgG (H+L), Alexa Fluor® 555 | Thermo Fisher        | A-21436        | 1:1000  | RRID:AB_2535857  |
| Anti-mouse IgG (H+L), Alexa Fluor® 488        | Cell Signaling       | 4408S          | 1:1000  | RRID:AB_10694704 |
| Anti-mouse IgG (H+L), Alexa Fluor® 555        | Cell Signaling       | 4409S          | 1:1000  | RRID:AB_1904022  |
| Anti-rabbit IgG (H+L), Alexa Fluor® 488       | Cell Signaling       | 4412S          | 1:1000  | RRID:AB_1904025  |
| Anti-rabbit IgG (H+L), Alexa Fluor® 555       | Cell Signaling       | 4413S          | 1:1000  | RRID:AB_10694110 |
| Anti-mouse IgG, HRP                           | GEHealthcare         | NA931V         | 1:10000 | RRID:AB_772210   |

**Table S2.** Samples for RNA-seq. RNA of each sample was prepared from three organoids pooled after RNA isolation. a: samples 3 and 17 contained RNA from only one organoid, samples 8 and 19 contained RNA from two pooled organoids. b: samples excluded from RNA-Seq analysis based on PCA and cluster dendrogram analyses. Seventeen samples carried a 7 basepair deletion in exon 3 of *RB1* [29], five samples carried a complete deletion of *RB1* exon1 [30]. Day: day of differentiation, experiment: independent repetitions of retinal differentiation.

| no | sample name                  | genotype                  | type of mutation | day | experiment |
|----|------------------------------|---------------------------|------------------|-----|------------|
| 1  | H9_d35_29DK                  | <i>RB1</i> <sup>wt</sup>  | -                | 35  | 29         |
| 2  | H9_d35_1HD                   | <i>RB1</i> <sup>wt</sup>  | -                | 35  | 1          |
| 3  | H9_d35_7JM <sup>a</sup>      | <i>RB1</i> <sup>wt</sup>  | -                | 35  | 7          |
| 4  | H9_d96_29DK                  | <i>RB1</i> <sup>wt</sup>  | -                | 96  | 29         |
| 5  | H9_d96_1HD                   | <i>RB1</i> <sup>wt</sup>  | -                | 96  | 1          |
| 6  | H9_d96_7JM                   | <i>RB1</i> <sup>wt</sup>  | -                | 96  | 7          |
| 7  | H9_d152_29DK                 | <i>RB1</i> <sup>wt</sup>  | -                | 152 | 29         |
| 8  | H9_d152_1HD <sup>a</sup>     | <i>RB1</i> <sup>wt</sup>  | -                | 152 | 1          |
| 9  | G12LS_d35_29DK               | <i>RB1</i> <sup>het</sup> | del7/ex3         | 35  | 29         |
| 10 | G12LS_d35_30DK <sup>b</sup>  | <i>RB1</i> <sup>het</sup> | del7/ex3         | 35  | 30         |
| 11 | G12LS_d35_31DK               | <i>RB1</i> <sup>het</sup> | del7/ex3         | 35  | 31         |
| 12 | 8B3_d35_1HD                  | <i>RB1</i> <sup>het</sup> | deletion ex1     | 35  | 1          |
| 13 | G12LS_d96_29DK               | <i>RB1</i> <sup>het</sup> | del7/ex3         | 96  | 29         |
| 14 | G12LS_d96_30DK <sup>b</sup>  | <i>RB1</i> <sup>het</sup> | del7/ex3         | 96  | 30         |
| 15 | G12LS_d96_31DK               | <i>RB1</i> <sup>het</sup> | del7/ex3         | 96  | 31         |
| 16 | 8B3_d96_1HD                  | <i>RB1</i> <sup>het</sup> | deletion ex1     | 96  | 1          |
| 17 | G12LS_d152_29DK <sup>a</sup> | <i>RB1</i> <sup>het</sup> | del7/ex3         | 152 | 29         |
| 18 | G12LS_d152_30DK <sup>b</sup> | <i>RB1</i> <sup>het</sup> | del7/ex3         | 152 | 30         |
| 19 | 8B3_d152_1HD <sup>a</sup>    | <i>RB1</i> <sup>het</sup> | deletion ex1     | 152 | 1          |
| 20 | C07_d35_29DK                 | <i>RB1</i> <sup>ko</sup>  | del7/ex3         | 35  | 29         |
| 21 | C07_d35_30DK                 | <i>RB1</i> <sup>ko</sup>  | del7/ex3         | 35  | 30         |
| 22 | C07_d35_31DK                 | <i>RB1</i> <sup>ko</sup>  | del7/ex3         | 35  | 31         |
| 23 | 8F2_d35_1HD                  | <i>RB1</i> <sup>ko</sup>  | deletion ex1     | 35  | 1          |
| 24 | C07_d96_29DK                 | <i>RB1</i> <sup>ko</sup>  | del7/ex3         | 96  | 29         |
| 25 | C07_d96_30DK                 | <i>RB1</i> <sup>ko</sup>  | del7/ex3         | 96  | 30         |
| 26 | C07_d96_31DK                 | <i>RB1</i> <sup>ko</sup>  | del7/ex3         | 96  | 31         |
| 27 | 8F2_d96_1HD                  | <i>RB1</i> <sup>ko</sup>  | deletion ex1     | 96  | 1          |
| 28 | C07_d152_29DK                | <i>RB1</i> <sup>ko</sup>  | del7/ex3         | 152 | 29         |
| 29 | C07_d152_30DK                | <i>RB1</i> <sup>ko</sup>  | del7/ex3         | 152 | 30         |
| 30 | C07_d160_7JM                 | <i>RB1</i> <sup>ko</sup>  | del7/ex3         | 160 | 7          |

**Table S3.** Predicted off-targets for gRNA targeting *RB1* exon 3. Prediction based on <https://chopchop.cbu.uib.no/>. Position: position of first nucleotide in hg38.

| no | position        | sequence                                            | gene        | location   |
|----|-----------------|-----------------------------------------------------|-------------|------------|
| 1  | chr1:16378014   | TACAGAAA <b>c</b> ACAGAGAAA <b>g</b> CAGG           | SZRD1       | intron 1   |
| 2  | chr1:160557515  | CCA <b>c</b> ATTTCT <b>g</b> TGTTTTCT <b>Gc</b> A   | CD84        | intron 1   |
| 3  | chr10:44709936  | TACA <b>a</b> AA <b>c</b> AACATAGAAA <b>c</b> CAGG  |             | intergenic |
| 4  | chr10:105719120 | CCAGAG <b>g</b> TTCT <b>g</b> TGT <b>c</b> TTTCTGTA | LINC02627   | intron 3   |
| 5  | chr12:15735675  | TACA <b>a</b> AtAAACATAG <b>t</b> AATCAGG           | EPS8        | intron 4   |
| 6  | chr12:49243439  | T <b>c</b> CAGAAAAA <b>a</b> AAGAAATCAGG            | TUBA1C      | intron 1   |
| 7  | chr13:47519932  | CCC <b>c</b> ATTTCTAT <b>t</b> TTTT <b>a</b> CTGTA  |             | intergenic |
| 8  | chr13:85093766  | CCTG <b>t</b> TTT <b>g</b> tTGTTTTCTGTA             | LINC00375   | intron 1   |
| 9  | chr13:87651127  | TACAGAAA <b>c</b> ACAGAGAAA <b>c</b> CAGG           | MIR4500HG   | intron 1   |
| 10 | chr14:85567936  | CCTGATT <b>t</b> TAT <b>t</b> TTTTCT <b>a</b> TA    | FLRT2       | intron 1   |
| 11 | chr14:86450777  | CCA <b>c</b> ATTTCTAT <b>Gc</b> TTTTCT <b>Gg</b> A  |             | intergenic |
| 12 | chr15:58023149  | TA <b>a</b> AGAAA <b>c</b> AATAGAAATCTGG            | ALDH1A2     | intron 1   |
| 13 | chr17:31152822  | CCT <b>t</b> ATTT <b>t</b> TATGTTTTCTGT <b>t</b>    | NF1         | intron 1   |
| 14 | chr18:21640391  | CCTGATT <b>t</b> T <b>t</b> TTTTTTCTGTA             |             | intergenic |
| 15 | chr18:29804666  | CCAT <b>t</b> ATTTCTAT <b>Ga</b> TTTTCT <b>a</b> TA |             | intergenic |
| 16 | chr19:12396150  | TACAGAAAAACAT <b>ga</b> AAAT <b>a</b> TGG           | ZNF799      | intron 1   |
| 17 | chr19:12435983  | TACAGAAAAACAT <b>ga</b> AAAT <b>a</b> TGG           | ZNF443      | intron 1   |
| 18 | chr19:22856339  | CCT <b>c</b> ATTT <b>t</b> <b>c</b> TGTTTTCTGTA     | ZNF723      | intron 3   |
| 19 | chr22:25011310  | CCTGATT <b>t</b> <b>g</b> TGTTTT <b>t</b> TGTA      | KIAA1671    | intron 1   |
| 20 | chr3:46015647   | CCTGATT <b>g</b> TAT <b>t</b> TTTTCT <b>c</b> TA    |             | intergenic |
| 21 | chr3:63497864   | CCAGAT <b>ga</b> CTATGT <b>g</b> TTTCTGTA           | SYNPR       | intron 3   |
| 22 | chr4:7322969    | CCCG <b>t</b> TTTT <b>t</b> TAT <b>c</b> TTTTCTGTA  | SORCS2      | intron 1   |
| 23 | chr4:60606464   | T <b>c</b> CAGAAAAACA <b>a</b> AGAAAT <b>a</b> AGG  |             | intergenic |
| 24 | chr4:89365361   | TACAGAAA <b>g</b> CATA <b>a</b> AAAT <b>t</b> TGG   |             | intergenic |
| 25 | chr4:139741179  | <b>a</b> ACAGAA <b>Ac</b> <b>t</b> TAGAAATCTGG      | MAML3       | intron 2   |
| 26 | chr4:150998516  | CCTGATT <b>t</b> <b>t</b> tTGTTTT <b>t</b> TGTA     | LRBA        | intron 2   |
| 27 | chr4:165165446  | CCAGATTCTAT <b>a</b> TaTTTCTGTA                     | TMEM192     | intron 2   |
| 28 | chr5:14486941   | CCTGATTCT <b>g</b> TGTTTTCT <b>ac</b> A             | TRIO        | intron 47  |
| 29 | chr5:19701084   | TACAGAAAA <b>g</b> ATA <b>a</b> AAAT <b>a</b> TGG   | CDH18       | intron 5   |
| 30 | chr5:88651871   | CCTGATT <b>c</b> AT <b>a</b> TaTTTCTGTA             | LINC00461   | intron 2   |
| 31 | chr5:105296348  | TACAT <b>a</b> AAAAACATAG <b>t</b> AT <b>g</b> GGG  | AC.099520.1 | intron 1   |
| 32 | chr5:141553893  | <b>g</b> A <b>a</b> AGAAAAACAGAGAAATCAGG            | DIAPH1      | intron 18  |
| 33 | chr6:33426433   | CCTGATTCT <b>c</b> T <b>a</b> TTTTCTGTA             | SYNGAP1     | intron 3   |
| 34 | chr6:92774734   | CC <b>t</b> Ag <b>g</b> TCTATGTTTTCTGTA             |             | intergenic |
| 35 | chr6:146080372  | <b>a</b> ACA <b>c</b> AAAAACAGAGAAATCAGG            | GRM1        | intron 2   |
| 36 | chr7:67830992   | TACAGAA <b>g</b> ACA <b>a</b> AGAAAT <b>t</b> TGG   |             | intergenic |
| 37 | chr7:72899909   | CCAGATT <b>t</b> TAT <b>Ga</b> TTTTCT <b>c</b> TA   | POM121      | intron 5   |
| 38 | chr7:100115160  | CCAGATT <b>t</b> TAT <b>c</b> TTTTCTGT <b>t</b>     | TAF6        | intron 2   |
| 39 | chr7:108272738  | CCAG <b>a</b> TTCTAT <b>t</b> TTTTCT <b>t</b> TA    | NRCAM       | intron 3   |
| 40 | chr8:16397344   | <b>a</b> A <b>a</b> AAAAAACATAGAAATCTGG             |             | intergenic |
| 41 | chr8:22686004   | T <b>g</b> AGAA <b>t</b> ACATAGAAATCTGG             |             | intergenic |
| 42 | chr8:137341828  | CCAT <b>c</b> TTTCTAT <b>c</b> TTTTCTGTA            |             | intergenic |
| 43 | chr9:70398258   | CCGGAT <b>c</b> TCT <b>g</b> TGTT <b>a</b> TCTGTA   | KLF9        | intron 1   |
| 44 | chr9:103648104  | <b>a</b> ACAGAAAA <b>a</b> <b>c</b> AGAAATCTGG      |             | intergenic |
| 45 | chr9:108702372  | T <b>c</b> CAGAAAA <b>c</b> <b>t</b> tGAAATCAGG     | AL358779.1  | intron 1   |
| 46 | chrX:48079160   | TA <b>a</b> AGAAAAACAGAGAAA <b>a</b> CAGG           |             | intergenic |
